# Supplementary material
Source: PubMed Central journal article supplement (PMC5710439)
Supplement: jamadermatol-153-1106-s001.pdf [file jamadermatol-153-1106-s001.pdf]

## Supplementary Online Content

Adamson AS, Zhou L, Baggett CD, Thomas NE, Meyer A-M. Association of delays in surgery for melanoma with insurance type. *JAMA Dermatol*. Published online October 4, 2017. doi:10.1001/jamadermatol.2017.3338

**eTable.** Healthcare Common Procedure Coding System (HCPCS) Codes and *International Classification of Diseases, Ninth Revision (ICD-9)* Codes for Procedure Identification

This supplementary material has been provided by the authors to give readers additional information about their work.

**eTable. Healthcare Common Procedure Coding System (HCPCS) Codes and International Classification of Diseases, Ninth Revision (ICD-9) Codes for Procedure Identification**

| <b>Code Category</b>   | <b>Code Type</b> | <b>Code List</b>                                                                                                                                                                                                                                                                                                                                                                                                                                                                                                                                                                                                                                                                                                                                                                                                                                         |
|------------------------|------------------|----------------------------------------------------------------------------------------------------------------------------------------------------------------------------------------------------------------------------------------------------------------------------------------------------------------------------------------------------------------------------------------------------------------------------------------------------------------------------------------------------------------------------------------------------------------------------------------------------------------------------------------------------------------------------------------------------------------------------------------------------------------------------------------------------------------------------------------------------------|
| Skin biopsy            | HCPCS            | 11100, 11101, 11755, 21550, 21920, 21925, 23065, 23066, 24065, 24066, 25065, 25066, 27040, 27041, 27323, 27324, 27613, 27614, 40490, 41100, 41105, 41108, 54100, 54105, 56605, 56606, 67810, 69100                                                                                                                                                                                                                                                                                                                                                                                                                                                                                                                                                                                                                                                       |
|                        | <i>ICD-9</i>     | 181, 1812, 1819, 2122, 2129, 241, 2411, 2419, 272, 2723, 2724, 641, 6411, 711, 7111, 7119, 81, 811, 811, 819, 861, 8611, 8619                                                                                                                                                                                                                                                                                                                                                                                                                                                                                                                                                                                                                                                                                                                            |
| Shave removal          | HCPCS            | 11300, 11301, 11302, 11303, 11305, 11306, 11307, 11308, 11310, 11311, 11312, 11313                                                                                                                                                                                                                                                                                                                                                                                                                                                                                                                                                                                                                                                                                                                                                                       |
| Mohs surgical excision | HCPCS            | 17304, 17305, 17306, 17307, 17310, 17311, 17312, 17313, 17314, 17315                                                                                                                                                                                                                                                                                                                                                                                                                                                                                                                                                                                                                                                                                                                                                                                     |
|                        | <i>ICD-9</i>     | 8624                                                                                                                                                                                                                                                                                                                                                                                                                                                                                                                                                                                                                                                                                                                                                                                                                                                     |
| Excision               | HCPCS            | 11400, 11401, 11402, 11403, 11404, 11406, 11420, 11421, 11422, 11423, 11424, 11426, 11440, 11441, 11442, 11443, 11444, 11446, 11600, 11601, 11602, 11603, 11604, 11605, 11606, 11620, 11621, 11622, 11623, 11624, 11626, 11640, 11641, 11642, 11643, 11644, 11646, 21011, 21012, 21013, 21014, 21015, 21016, 21552, 21554, 21555, 21556, 21557, 21558, 21930, 21931, 21932, 21933, 21935, 21936, 22900, 22901, 22902, 22903, 22904, 22905, 23071, 23073, 23075, 23076, 23077, 23078, 23221, 23222, 24065, 24071, 24073, 24075, 24076, 24077, 24079, 24151, 24153, 25065, 25071, 25073, 25075, 25076, 25077, 25078, 26111, 26113, 26115, 26116, 26117, 26118, 26255, 26261, 27043, 27045, 27047, 27048, 27049, 27059, 27079, 27327, 27328, 27329, 27337, 27339, 27364, 27615, 27616, 27618, 27619, 27632, 27634, 28039, 28041, 28043, 28045, 28046, 28047 |
|                        | <i>ICD-9</i>     | 182, 1821, 1829, 183, 1831, 189, 213, 2130, 2132, 2431, 2742, 2743, 2749, 613, 642, 713, 776, 778, 82, 820, 822, 823, 8239, 833, 834, 862, 8623, 863, 864, 8699                                                                                                                                                                                                                                                                                                                                                                                                                                                                                                                                                                                                                                                                                          |
